# Supplementary material for: Layer-by-layer coating of natural diatomite with silver nanoparticles for identification of circulating cancer protein biomarkers using SERS
Source: Royal Society of Chemistry journal article supplement (doi:10.1039/d3nr02602g), 2023-01-01
Supplement: d3nr02602g1.pdf [file d3nr02602g1.pdf]

Electronic Supplementary Information

**Layer-by-layer coating of natural diatomite with silver nanoparticles for  
identification of circulating cancer protein biomarkers using SERS**

Ayşe Mine Sarıdag<sup>1</sup> and Mehmet Kahraman<sup>1\*</sup>

<sup>1</sup>Department of Chemistry, Faculty of Arts and Sciences, Gaziantep University, 27310,  
Gaziantep, Turkey

[\\*mskahraman46@gmail.com](mailto:*mskahraman46@gmail.com)

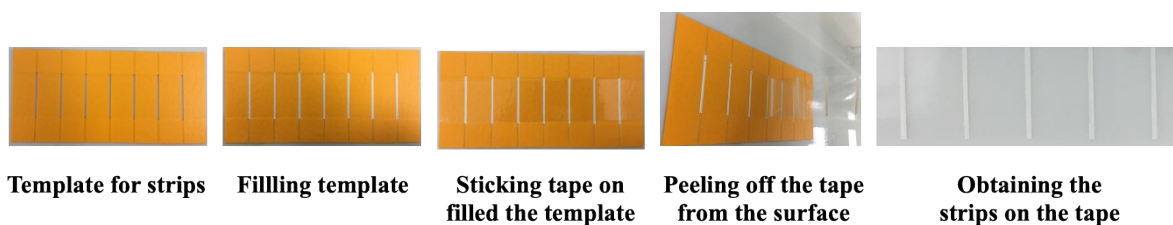

**Figure S1.** Photos of templates and procedures for the fabrication of SERS active strips on a regular box tape.

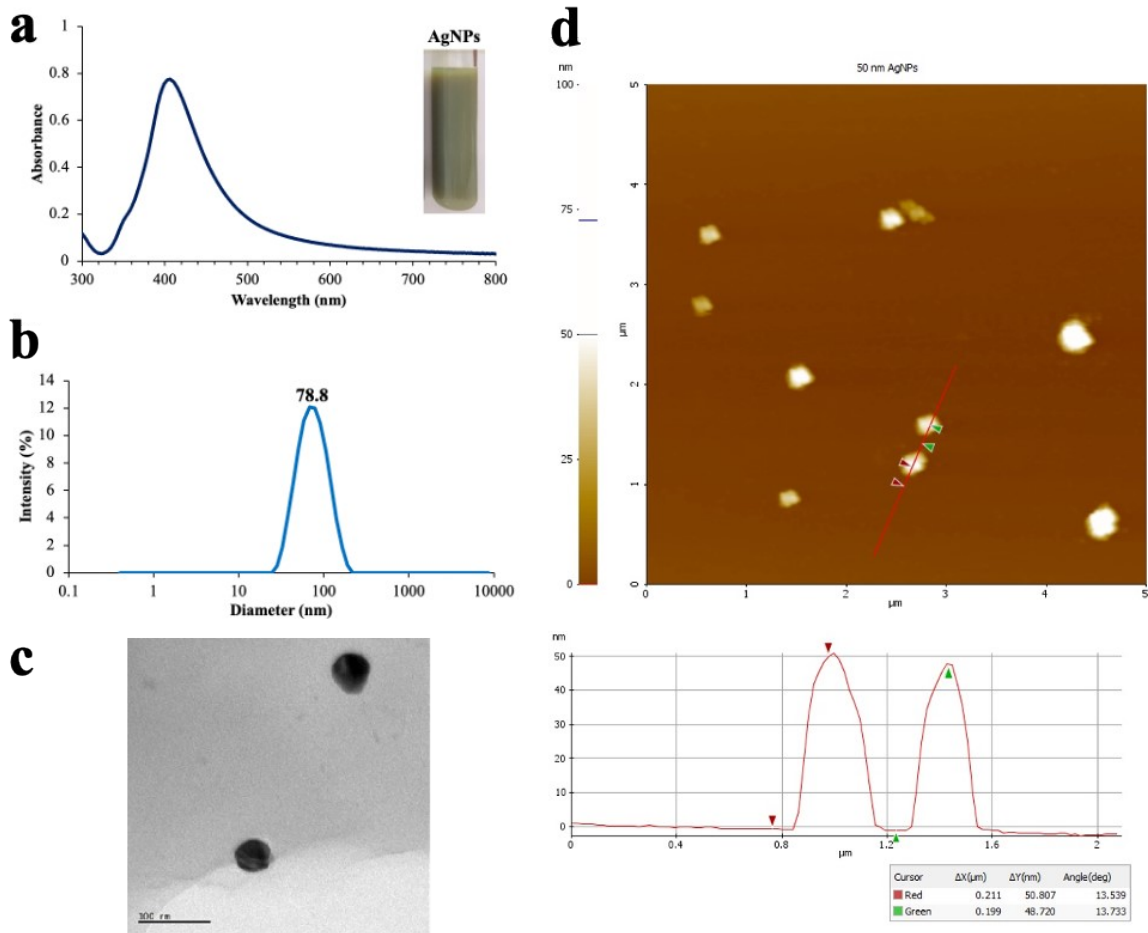

**Figure S2. a)** UV/Vis. absorption spectrum and suspension color, **b)** particle size distribution graph, **c)** TEM image, **d)** AFM images and line profile analysis of synthesized AgNPs.

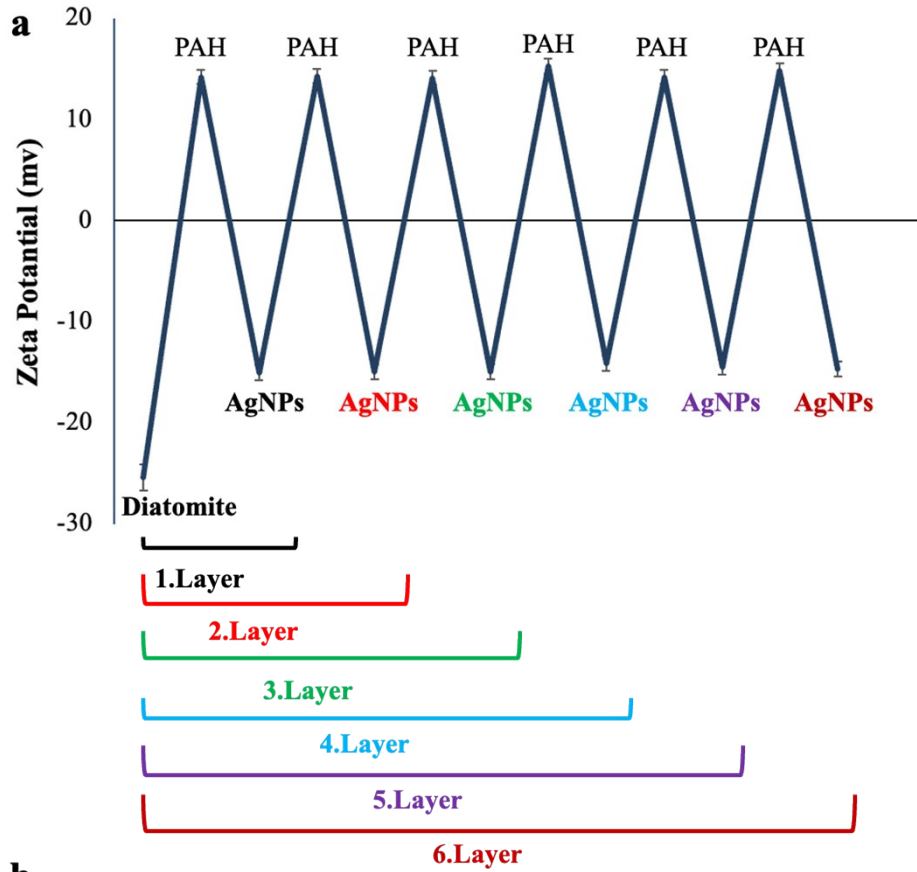

**b**

| Diatomite | 1. Step | 2. Step | 3. Step | 4. Step | 5. Step | 6. Step | 7. Step | 8. Step | 9. Step | 10. step | 11. Step | 12. Step |
|-----------|---------|---------|---------|---------|---------|---------|---------|---------|---------|----------|----------|----------|
| -25.4     | 14.2    | -15.0   | 14.3    | -14.9   | 14.1    | -14.9   | 15.3    | -14.1   | 14.2    | -14.5    | 14.8     | -14.7    |

**Figure S3.** Zeta potential changes of diatomite and each step for the fabrication of nanocomposites with different layers **(a)** and zeta potential values obtained from each step **(b)**.

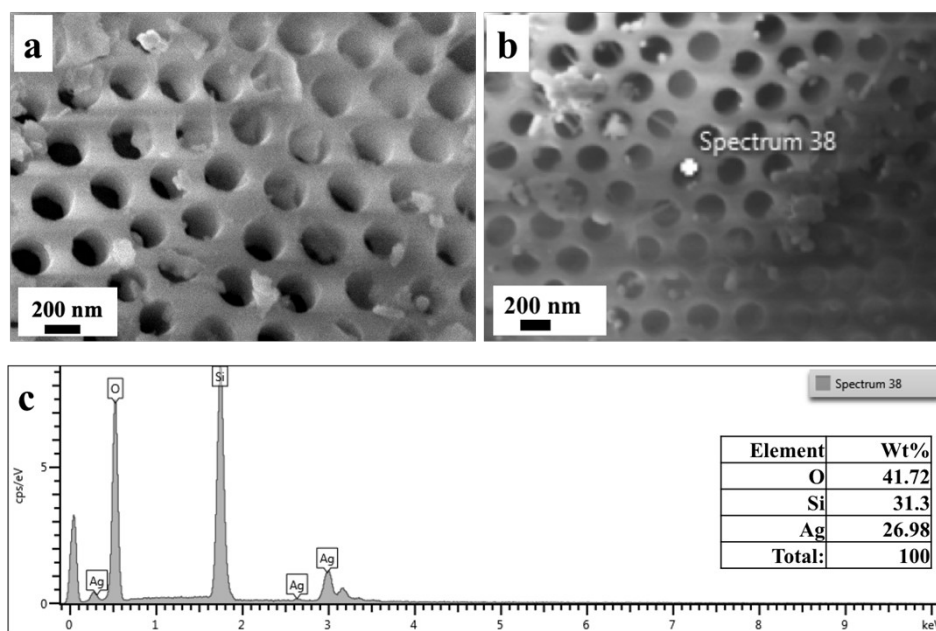

**Figure S4.** SEM image of empty diatomite (a) and SEM image (b) with EDS spot spectrum (c) of silver nanoparticles in diatomite pores.

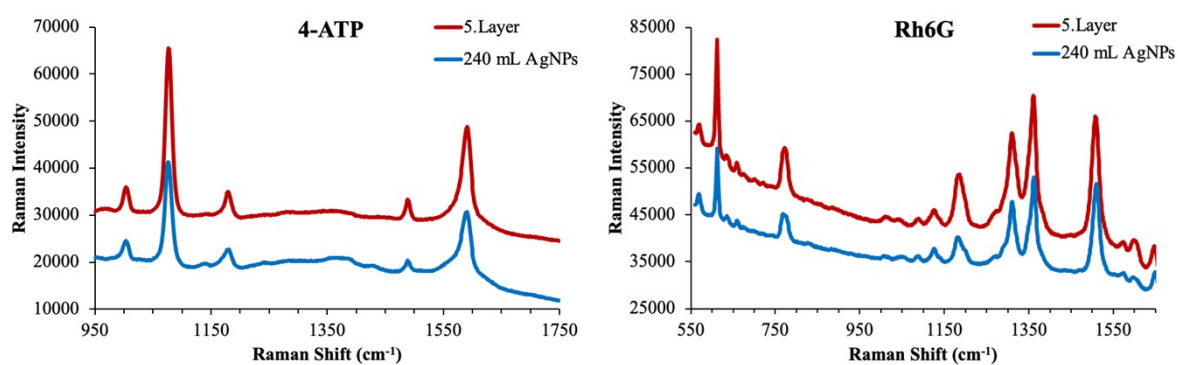

**Figure S5.** Comparison of the SERS spectra of 4-ATP and Rh6G on the strips prepared by simple mixing and using the LbL method.

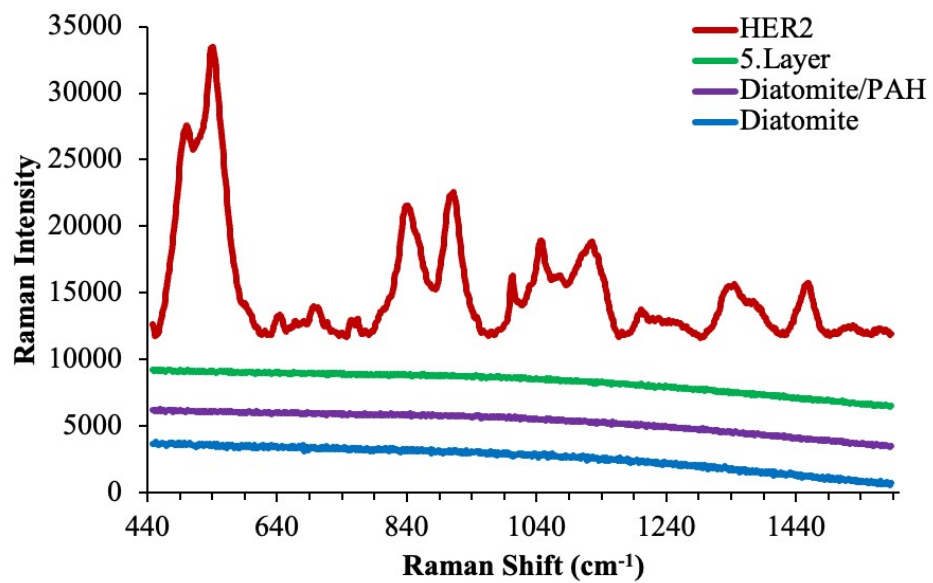

**Figure S6.** The comparison of SERS spectra obtained from the backgrounds and HER2 biomarker.

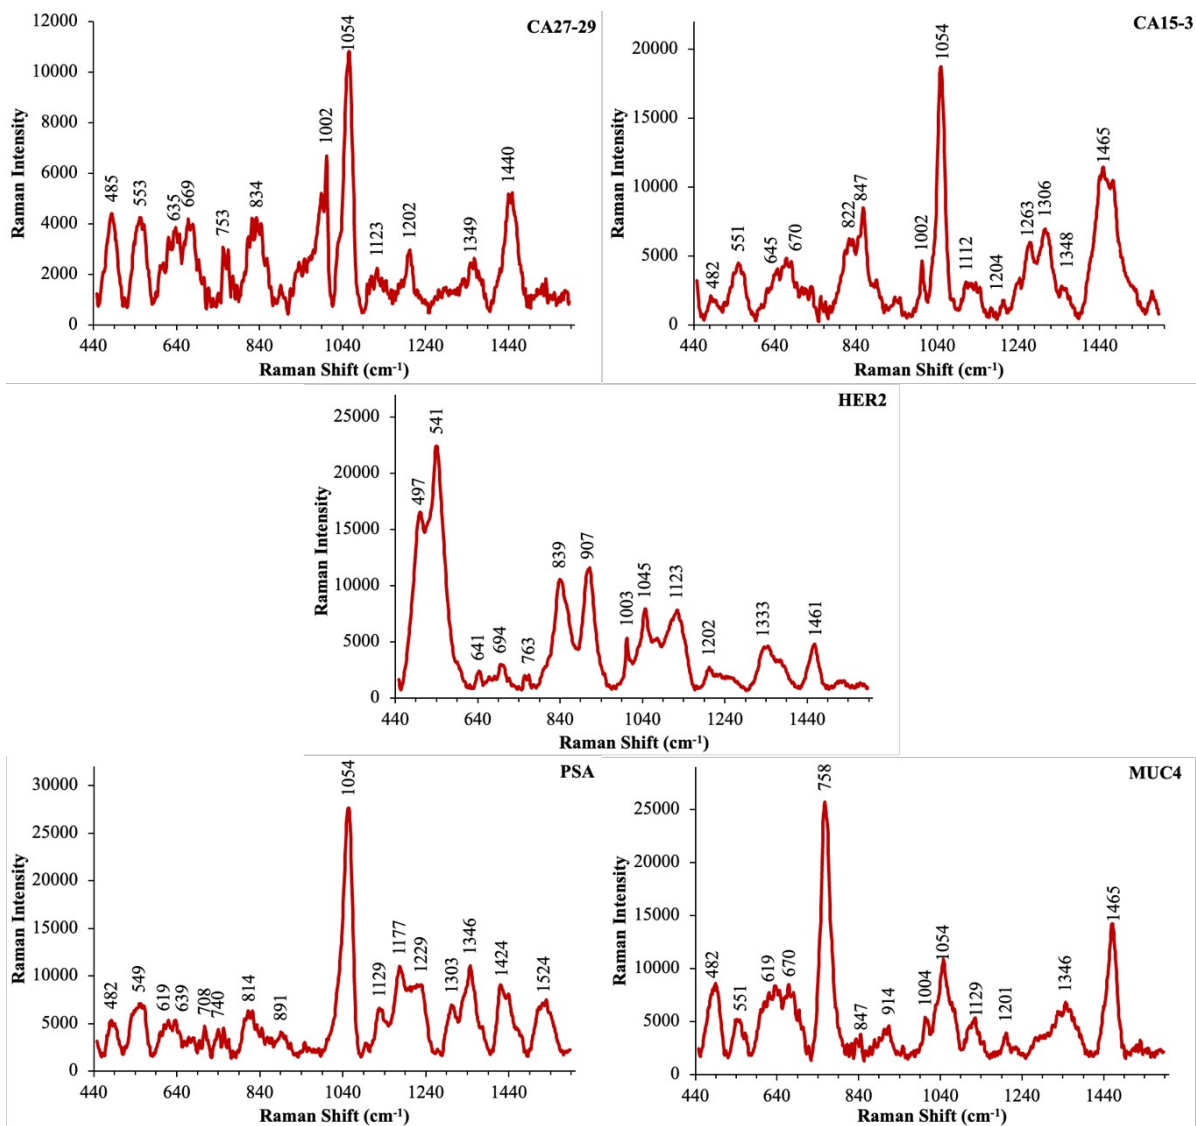

**Figure S7.** Individual SERS spectrum obtained from each protein.

**Table S1.** Peak positions and tentative peak assignments for the SERS spectra of the cancer protein biomarkers.

| Raman Shift (cm <sup>-1</sup> ) |        |       |       |      | Proteins                      |
|---------------------------------|--------|-------|-------|------|-------------------------------|
| CA27-29                         | CA15-3 | HER 2 | MUC 4 | PSA  |                               |
| 485                             | 482    | 497   | 482   | 482  | <b>Cysteine</b>               |
| 553                             | 551    | 541   | 551   | 549  | <b>Tryptophan</b>             |
| -                               | -      | -     | 619   | 619  | <b>Phenylalanine</b>          |
| 635                             | 645    | 641   | -     | -    | <b>Tyrosine</b>               |
| 669                             | 670    | -     | 670   | -    | <b>C-C protein</b>            |
| 753                             | -      | 763   | 758   | 740  | <b>Tryptohan</b>              |
| 834                             | 847    | 839   | 847   | 814  | <b>Tyrosine</b>               |
| -                               | -      | 907   | 914   | -    | <b>Tryptohan</b>              |
| 1002                            | 1002   | 1003  | 1004  | -    | <b>Phenylalanine</b>          |
| 1054                            | 1054   | 1045  | 1054  | 1054 | <b>C-N ve C-O Protein</b>     |
| 1123                            | 1112   | 1123  | 1129  | 1129 | <b>C-N Protein</b>            |
| 1202                            | 1204   | 1202  | 1201  | 1229 | <b>Tyrosine+Phenylalanine</b> |
| 1349                            | 1348   | 1333  | 1346  | 1346 | <b>Tryptohan</b>              |
| 1440                            | 1465   | 1461  | 1465  | 1424 | <b>CH<sub>2</sub> Protein</b> |

**Table S2.** a) Summary result for the peak intensity comparison at around 1123 cm<sup>-1</sup>, and b) all calculated p-values using ANOVA.

**a**

| SUMMARY  |       |          |         |            |
|----------|-------|----------|---------|------------|
| Groups   | Count | Sum      | Average | Variance   |
| CA 27-29 | 10    | 10079.50 | 1007.95 | 138743.28  |
| CA15-3   | 10    | 18934.09 | 1893.41 | 1307340.20 |
| HER2     | 10    | 91439.84 | 9143.98 | 592651.09  |
| MUC4     | 10    | 53658.58 | 5365.86 | 812919.52  |
| PSA      | 10    | 45578.65 | 4557.87 | 2762359.11 |

  

| ANOVA               |              |       |              |       |         |        |
|---------------------|--------------|-------|--------------|-------|---------|--------|
| Source of Variation | SS           | df    | MS           | F     | P-value | F crit |
| Between Groups      | 412519911.15 | 4.00  | 103129977.79 | 91.85 | 0.00    | 2.58   |
| Within Groups       | 50526118.86  | 45.00 | 1122802.64   |       |         |        |
| Total               | 463046030.02 | 49.00 |              |       |         |        |

**b**

| Raman Shift (cm <sup>-1</sup> ) | 487      | 551      | 834      | 1054     | 1123     | 1349     | 1440     |
|---------------------------------|----------|----------|----------|----------|----------|----------|----------|
| <b>P-value</b>                  | 7.34E-22 | 9.55E-24 | 8.13E-26 | 2.58E-14 | 4.74E-21 | 4.91E-17 | 4.22E-07 |
